# Supplementary material for: Control of aurophilic interaction: conformations and electronic structures of one-dimensional supramolecular architectures
Source: Royal Society of Chemistry journal article supplement (doi:10.1039/c7dt01383c), 2017-01-01
Supplement: c7dt01383c1.pdf [file c7dt01383c1.pdf]

## Supporting Information

# Control of Auophilic Interaction: Conformations and Electron Structures of One-Dimensional Supramolecular Architectures

Hiroaki Imoto,<sup>[a]</sup> Shintaro Nishiyama,<sup>[a]</sup> Takashi Yumura,<sup>[b]</sup> Seiji Watase,<sup>[c]</sup> Kimihiro Matsukawa,<sup>[a,c]</sup> Kensuke Naka<sup>[a]\*</sup>

<sup>[a]</sup> Faculty of Molecular Chemistry and Engineering, Graduate School of Science and Technology, Kyoto Institute of Technology, Goshokaido-cho, Matsugasaki, Sakyo-ku, Kyoto 606-8585, Japan.

<sup>[b]</sup> Faculty of Materials Science and Engineering, Graduate School of Science and Technology, Kyoto Institute of Technology, Goshokaido-cho, Matsugasaki, Sakyo-ku, Kyoto 606-8585, Japan.

<sup>[c]</sup> Osaka Municipal Technical Research Institute, 1-6-50 Morinomiya, Joto-ku, Osaka 536-8553, Japan.

### Contents:

1. NMR spectra
2. Crystallographic data
3. Absorption spectra
4. DFT calculation

## 1. NMR spectra

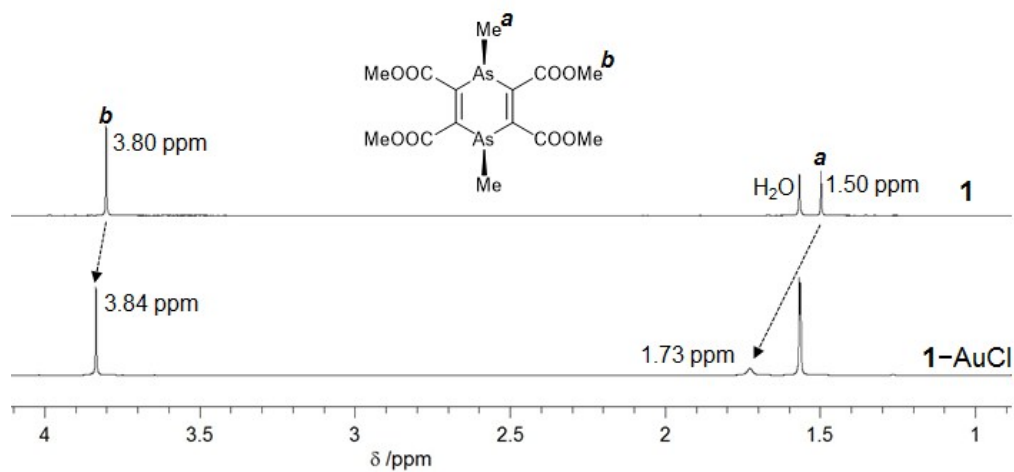

**Figure S1.**  $^1\text{H}$ -NMR spectra (400 MHz) of **1** and **1-AuCl** in  $\text{CDCl}_3$ .

## 2. Crystallographic data

**Table S1.** Crystallographic Data.

| <b>1–AuCl</b>                           |                                                                                                |
|-----------------------------------------|------------------------------------------------------------------------------------------------|
| Crystal data                            |                                                                                                |
| Empirical Formula                       | C <sub>14</sub> H <sub>18</sub> As <sub>2</sub> Au <sub>2</sub> Cl <sub>2</sub> O <sub>8</sub> |
| Formula Weight                          | 928.97                                                                                         |
| Crystal Dimension, mm <sup>3</sup>      | 0.150 × 0.100 × 0.100                                                                          |
| Crystal System                          | triclinic                                                                                      |
| Space Group                             | P-1                                                                                            |
| a, Å                                    | 9.7958(3)                                                                                      |
| b, Å                                    | 10.6346(4)                                                                                     |
| c, Å                                    | 13.0215(4)                                                                                     |
| α, deg                                  | 79.1560(12)                                                                                    |
| β, deg                                  | 74.7870(9)                                                                                     |
| γ, deg                                  | 60.7176(10)                                                                                    |
| Volume, Å <sup>3</sup>                  | 1138.83(7)                                                                                     |
| D <sub>calcd</sub> , g cm <sup>-3</sup> | 2.709                                                                                          |
| Z                                       | 2                                                                                              |
| F(000)                                  | 848.00                                                                                         |
| Data Collection                         |                                                                                                |
| Temperature, deg                        | 23.0                                                                                           |
| 2θ <sub>max</sub> , deg                 | 54.9                                                                                           |
| T <sub>min</sub> /T <sub>max</sub>      | 0.082 / 0.201                                                                                  |
| Refinement                              |                                                                                                |
| No. of Observed Data                    | 5167                                                                                           |
| No. of Parameters                       | 253                                                                                            |
| R1 <sup>a</sup> , wR2 <sup>b</sup>      | 0.0349, 0.0826                                                                                 |
| Goodness of Fit Indicator               | 1.073                                                                                          |

$$^a R1 = \sum | |Fo| - |Fc| | / \sum |Fo| \quad ^b wR2 = [ \sum w ((Fo^2 - Fc^2)^2 / \sum w (Fo^2)^2 )^{1/2} \quad w = [ \sigma^2(Fo^2) ]^{-1}$$

CCDC # 1527551 (1–AuCl)

### 3. Absorption spectra

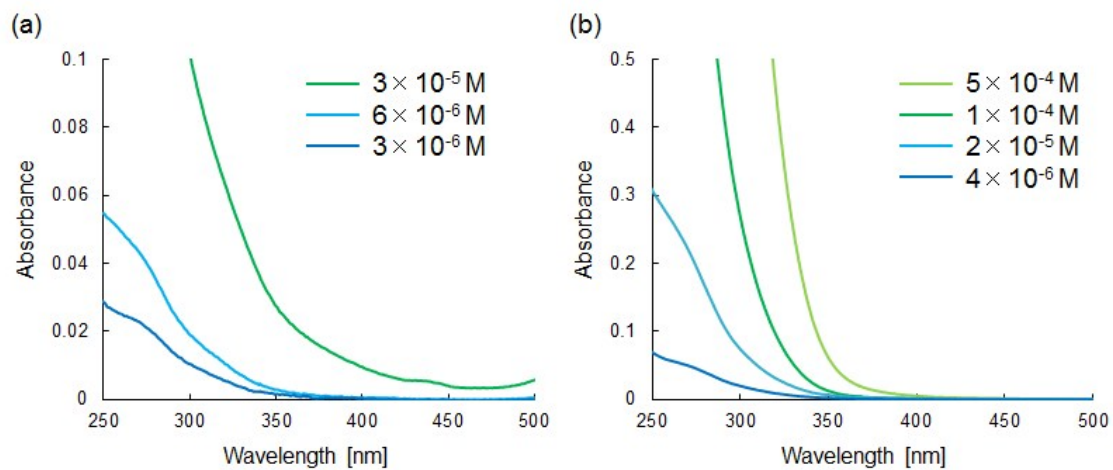

**Figure S2.** UV-vis absorption spectra of (a) **1**-AuCl and (b) **2**-AuCl with changing the concentration. The offsets of the spectra were red-shifted under concentrated conditions (**1**-AuCl:  $3 \times 10^{-5} \text{ M}$ , **2**-AuCl:  $5 \times 10^{-4} \text{ M}$ ).

### 3. DFT calculation

#### (a) Finite 1–AuCl chain with 16 Au atoms

LUMO+1: –2.45 eV

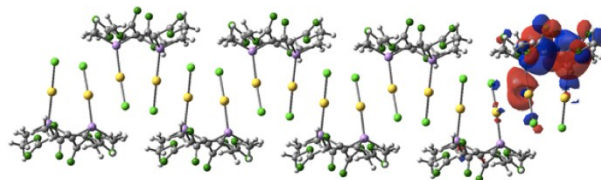

LUMO: –2.45 eV

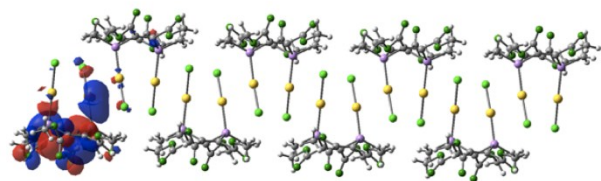

#### (b) Finite 2–AuCl chain with 16 Au atoms

LUMO+1: –2.25 eV

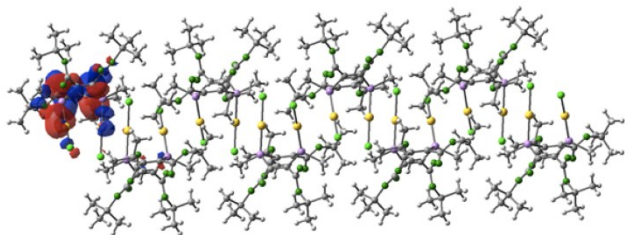

LUMO: –2.25 eV

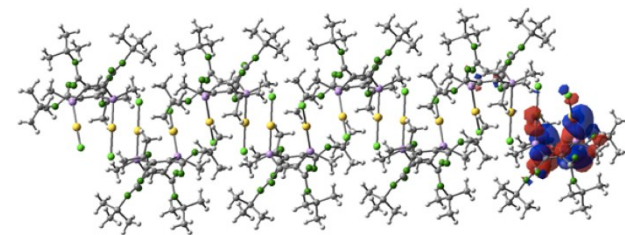

**Figure S3.** Unoccupied orbitals in the frontier orbitals regions finite (a) 1–AuCl and (b) 2–AuCl chains containing 16 Au atoms.

(a) Finite 1–AuCl chain with 4 Au atoms

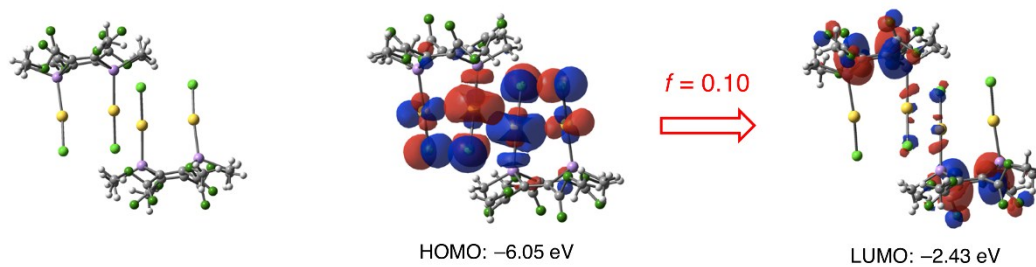

(b) Finite 2–AuCl chain with 4 Au atoms

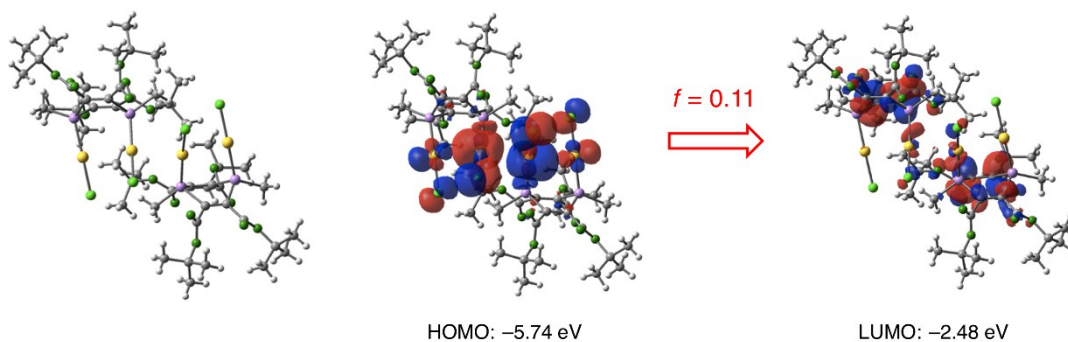

**Figure S4.** Frontier orbitals of finite (a) 1–AuCl and (b) 2–AuCl chains containing 4 Au atoms that are responsible for electronic transition with substantial oscillator strength ( $f$ ), obtained from TD-DFT calculations with B3LYP functional.
